# Supplementary material for: An Optimized Small-Scale Rearing System to Support Embryonic Microinjection Protocols for Western Corn Rootworm, Diabrotica virgifera virgifera
Source: MDPI journal article supplement (doi:10.3390/insects14080683), 2023-08-02
Supplement: s1 [file s1]

**Table S1. Reagents and Equipment**

| <b>Name of Reagent/ Equipment</b>                    | <b>Company</b>             | <b>Catalog Number</b> | <b>Comments/Description</b>                                  |
|------------------------------------------------------|----------------------------|-----------------------|--------------------------------------------------------------|
| 30 ml (1 oz) Cup                                     | Anny's plastic tableware   | ASET101               | Egg container                                                |
| 178 ml (6 oz) Plastic Souffle / Portion Cup          | Webstaurantstore           | 128E506               | Single pair mating chamber                                   |
| 475 ml (16 oz) Plastic Deli Container with Lid       | Webstaurantstore           | 128hd16combo          | Primary rearing container                                    |
| 950 ml (32 oz) Meal Prep Container                   | Webstaurantstore           | 128NC888              | Secondary/Tertiary rearing container                         |
| Braided Cotton Rolls                                 | Richmond Dental Cotton Co. | 605-3599              | Use in water supply for adult colony                         |
| BugDorm                                              | MegaView Science           | DP1000_5P             | Cage for adult colony                                        |
| Clorox Regular-Bleach1                               | Clorox                     | 44600-30770           | Washing corn and dishes                                      |
| Cotton Balls, Large                                  | Genesee Scientific         | 51-101                | Capping the flask                                            |
| Drosophila Agar                                      | Apex                       | 66-103                | Making agar dish for egg-lay / type II                       |
| Falcon Tissue Culture Dishes                         | Falcon                     | 25383-103             | Sprouting corn / 150 x 25 mm                                 |
| Featherweight Forceps                                | Bioquip                    | 4748                  | Moving larvae and pupae                                      |
| Fisherbrand Quantitative-Grade Filter Paper Circles  | Fisherbrand                | S47576C               | Making agar dish for egg-lay / 9 cm                          |
| Globe Scientific 3.0 mL Small Bulb Transfer Pipettes | Globe Scientific           | 137035                | Collect and transfer eggs                                    |
| Grade 90 Cheesecloth                                 | Online Fabric Store        | CHEE90                | For egg-lay                                                  |
| Miniature Brush                                      | Myartscape                 | MAS-102-MINI          | Liner 2/0                                                    |
| Parafilm                                             | Parafilm                   | 734655769967          | Seal agar dish after microinjection/roll size 4 in. x 125 ft |
| Percival Incubator                                   | Percival                   | I41VLH3C8             | WCR growth chamber                                           |
| Petri Dish                                           | SIGMA                      | CLS430588-500EA       | Diet plate / 35 x 10 mm                                      |
| Petri Dish                                           | VWR                        | 89038-968             | Making agar dish for egg-lay / 100 x 15 mm                   |
| PYREX Griffin Low Form Beakers                       | PYREX                      | 1000-600-PK           | For washing eggs                                             |
| PYREX Narrow Mouth Erlenmeyer Flasks                 | PYREX                      | 4980-300-PK           | Water container for adult colony                             |
| Qualitative Filter Paper                             | Ahlstrom                   | 8613-0900             | For microinjection / black                                   |
| Reynolds Wrap Aluminum Foil                          | Reynolds                   | 458742928317          | Egg-lay cover                                                |
| Scotts Premium Topsoil                               | The Scotts Company         | 71130758              | Soil for growing corn                                        |
| Sparkleen                                            | Fisherbrand                | 04-320-4              | For washing dishes                                           |
| Trucker's Favorite Yellow                            | Coor Farm Supply           | 502                   | Corn for feeding WCR                                         |
| Western Corn Rootworm w/o Pollen Substitute          | Frontier Insect Diet       | F9766B                | WCR adult artificial diet                                    |

**Table S2. Quality control raw data: survival rate**

| <b>Week</b> | <b># of Insects</b> | <b># of Adults</b> | <b>Survival Rate %</b> |
|-------------|---------------------|--------------------|------------------------|
| 1           | 264                 | 204                | 77.27%                 |
| 2           | 198                 | 83                 | 41.92%                 |
| 3           | 589                 | 447                | 75.89%                 |
| 4           | 247                 | 179                | 72.47%                 |
| 5           | 293                 | 240                | 81.91%                 |
| 6           | 113                 | 66                 | 58.41%                 |
| 7           | 346                 | 261                | 75.43%                 |
| 8           | 343                 | 303                | 88.34%                 |
| 9           | 519                 | 459                | 88.44%                 |
| 10          | 659                 | 319                | 48.41%                 |
| 11          | 489                 | 354                | 72.39%                 |
| 12          | 572                 | 323                | 56.47%                 |
| 13          | 263                 | 215                | 81.75%                 |
| 14          | 366                 | 308                | 84.15%                 |
| 15          | 375                 | 129                | 34.40%                 |
| 16          | 719                 | 567                | 78.86%                 |
| 17          | 491                 | 456                | 92.87%                 |
| 18          | 377                 | 293                | 77.72%                 |
| 19          | 432                 | 278                | 64.35%                 |

**Table S3. Single-pair outcrosses to determine risk of pre-mating**

| Cross #   | DsRed+ Larvae (week1) | Total Larvae | Total DsRed+ | Total Larvae | Rate   |
|-----------|-----------------------|--------------|--------------|--------------|--------|
| 1         | 4                     | 29           | 53           | 412          | 12.86% |
| 2         | 34                    | 141          | 75           | 415          | 18.07% |
| 3         | 43                    | 146          | 121          | 432          | 28.01% |
| 4         | 28                    | 115          | 153          | 465          | 32.90% |
| 5         | 54                    | 118          | 66           | 149          | 44.30% |
| 6         | 28                    | 79           | 59           | 180          | 32.78% |
| 7         | 23                    | 42           | 30           | 68           | 44.12% |
| 8         | 12                    | 184          | 47           | 608          | 7.73%  |
| 9         | 22                    | 200          | 24           | 239          | 10.04% |
| 10        | 39                    | 146          | 216          | 693          | 31.17% |
| 11        | 8                     | 97           | 37           | 463          | 7.99%  |
| 12        | 87                    | 255          | 266          | 728          | 36.54% |
| 13        | 28                    | 111          | 107          | 636          | 16.82% |
| 14        | 11                    | 113          | 80           | 558          | 14.34% |
| 15        | 57                    | 167          | 163          | 469          | 34.75% |
| Control 1 | 61                    | 139          | 85           | 211          | 40.28% |
| Control 2 | 58                    | 133          | 87           | 268          | 32.46% |
| Control 3 | 38                    | 105          | 70           | 272          | 25.74% |
| Control 4 | 22                    | 104          | 41           | 244          | 16.80% |

Outcrossed wild-type females with transgenic (DsRed) males to determine if pre-mating occurs in adult collection containers. Control crosses were transgenic females crossed to wild-type males.
